# Supplementary material for: Selenium-silk microgels as antifungal and antibacterial agents
Source: Royal Society of Chemistry journal article supplement (doi:10.1039/d3nh00385j), 2024-01-01
Supplement: d3nh00385j1.pdf [file d3nh00385j1.pdf]

# Selenium-silk Microgels as Antifungal and Antibacterial Agents

Elizabeth G. Wiita,<sup>†,‡</sup> Zenon Toprakcioglu,<sup>†,‡</sup> Akhila K. Jayaram,<sup>†,¶</sup> and Tuomas  
P. J. Knowles<sup>\*,†,¶</sup>

<sup>†</sup>*Centre for Misfolding Diseases, Yusuf Hamied Department of Chemistry, University of  
Cambridge, Lensfield Road, Cambridge CB2 1EW, UK*

<sup>‡</sup>*These authors contributed equally*

<sup>¶</sup>*Cavendish Laboratory, Department of Physics, University of Cambridge, J J Thomson  
Avenue, Cambridge CB3 0HE, UK*

E-mail: tpjk2@cam.ac.uk

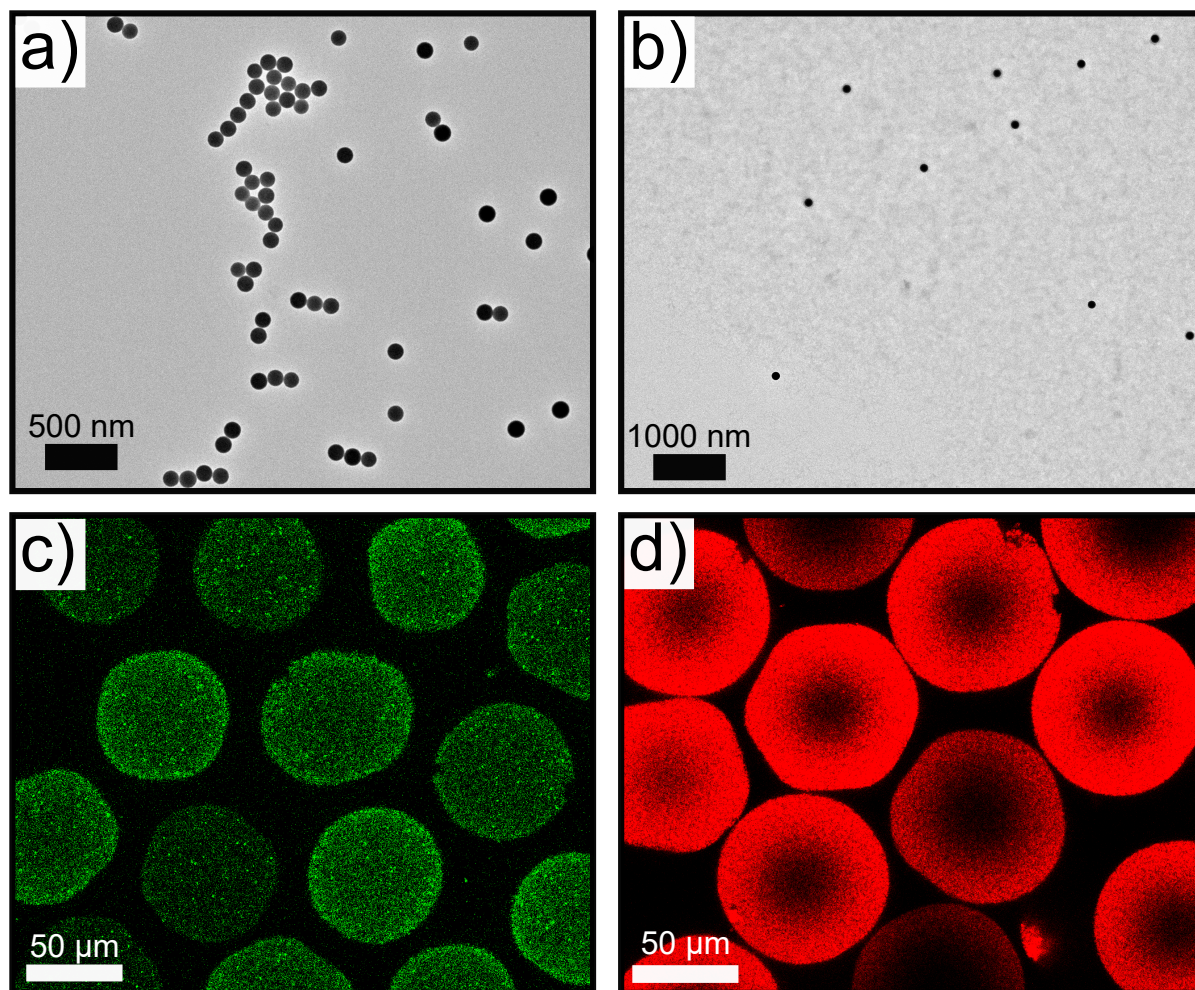

**Figure 1:** TEM micrographs for two samples: (a) 200  $\mu\text{g/mL}$  SeNPs alone and (b) 200  $\mu\text{g/mL}$  SeNPs with silk. SeNPs are dispersed throughout the silk fibrillar network. (c-d) Confocal images of selenium-silk microgels with Syto9 (green) and propidium iodide (red). Confocal images indicate that the microgels are approximately 70  $\mu\text{m}$  in diameter.

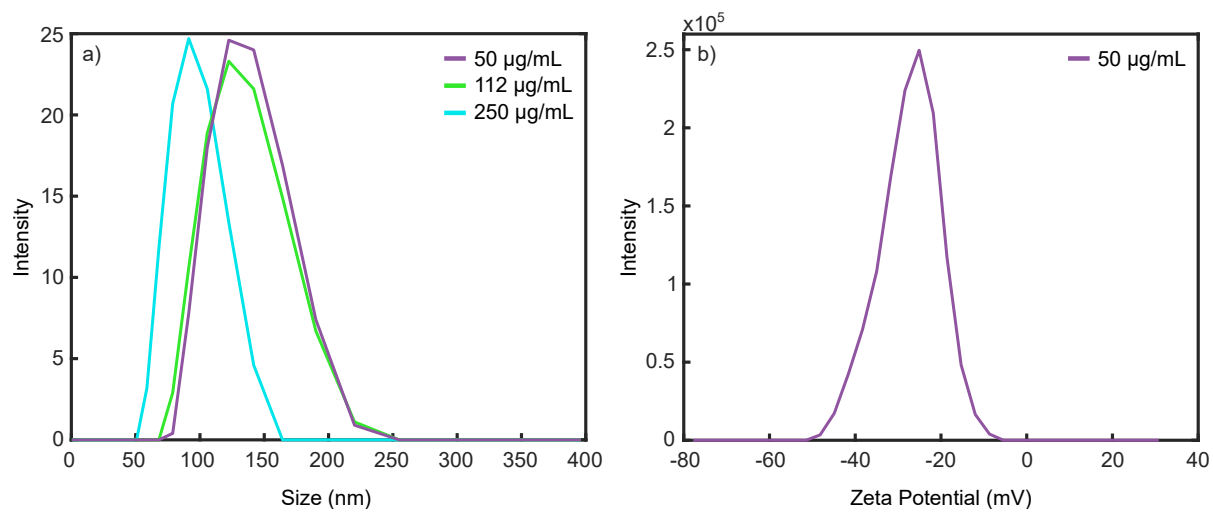

**Figure 2:** Dynamic light scattering data of the size distribution of SeNPs and the respective zeta potential values for the 50 $\mu\text{g/mL}$ .

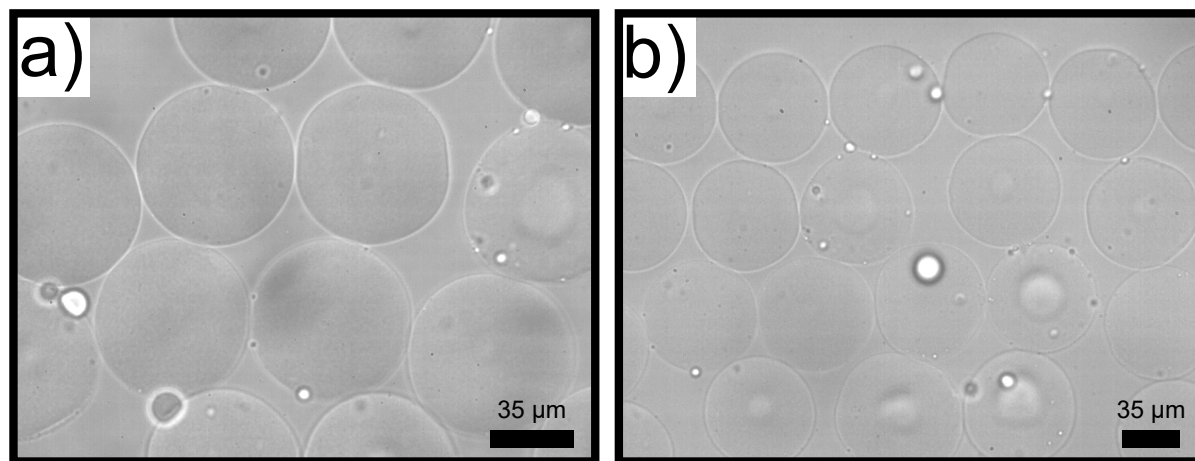

**Figure 3:** Optical microscopy images of de-emulsified selenium-silk microgels.

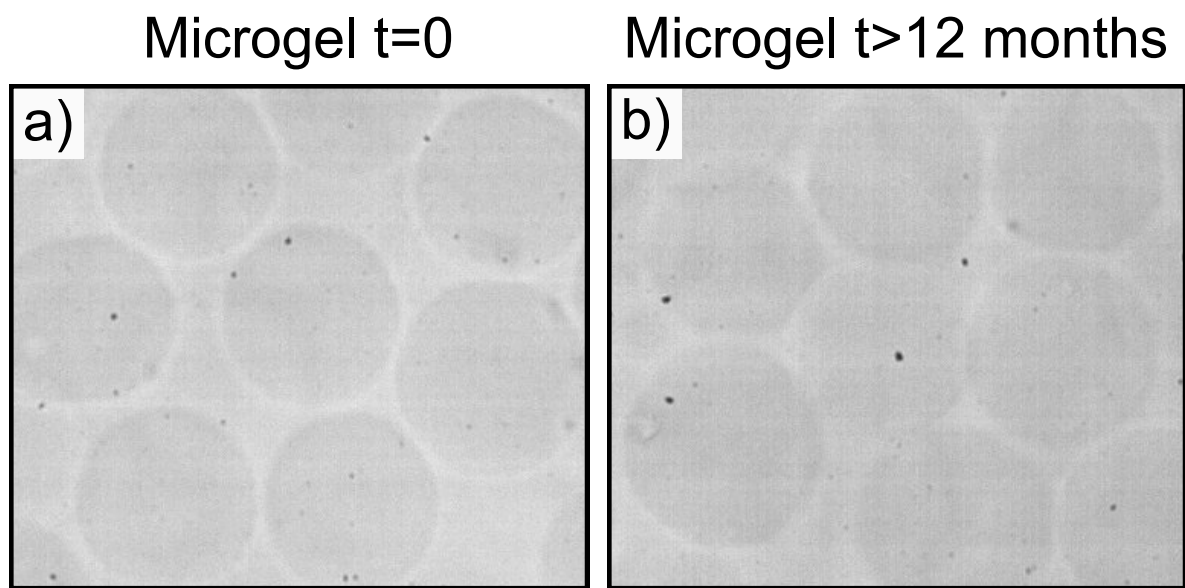

**Figure 4:** Optical microscopy images of microgels captured immediately following formation and after 12 months at room temperature.



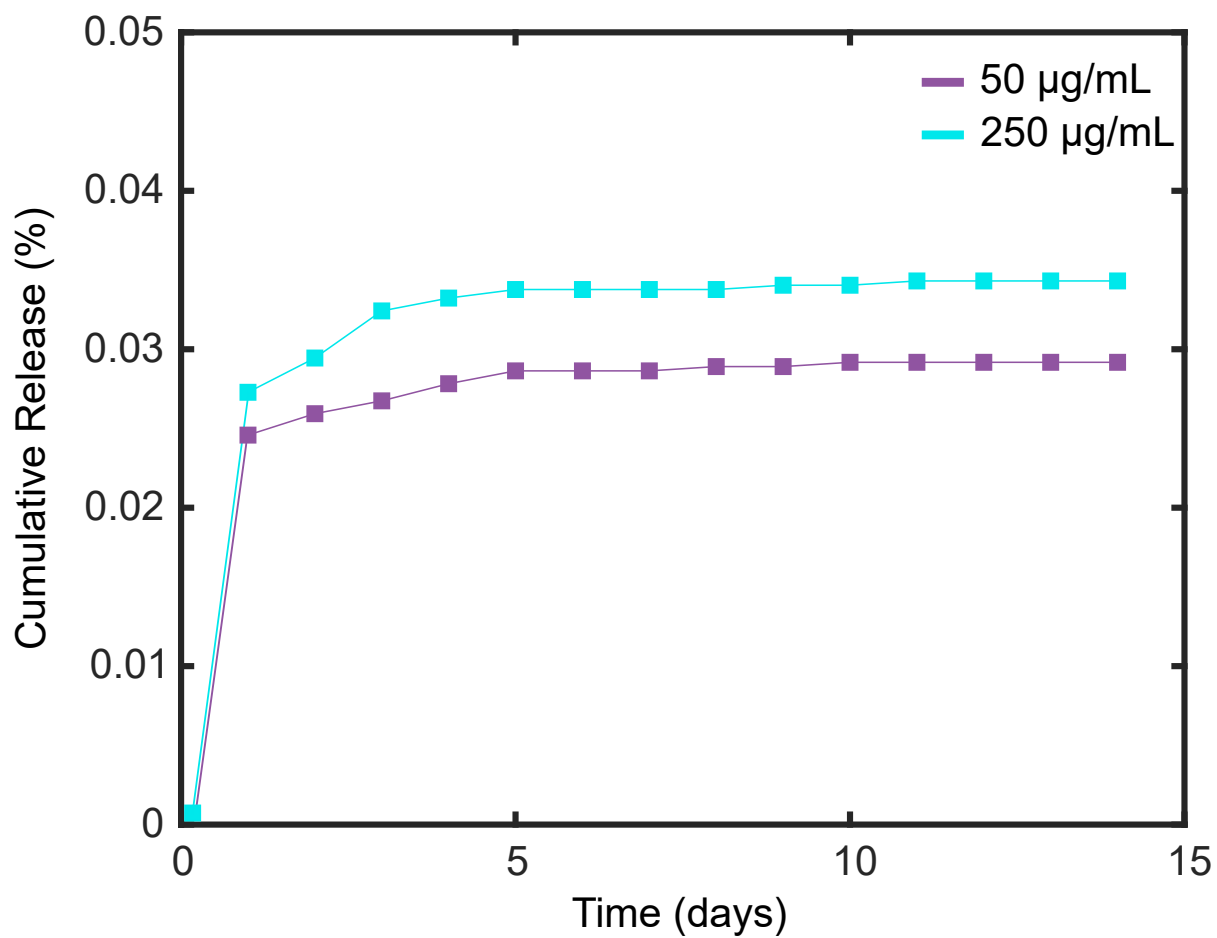

**Figure 5:** Cumulative release of nanoparticles from the microgels over a period of two weeks.

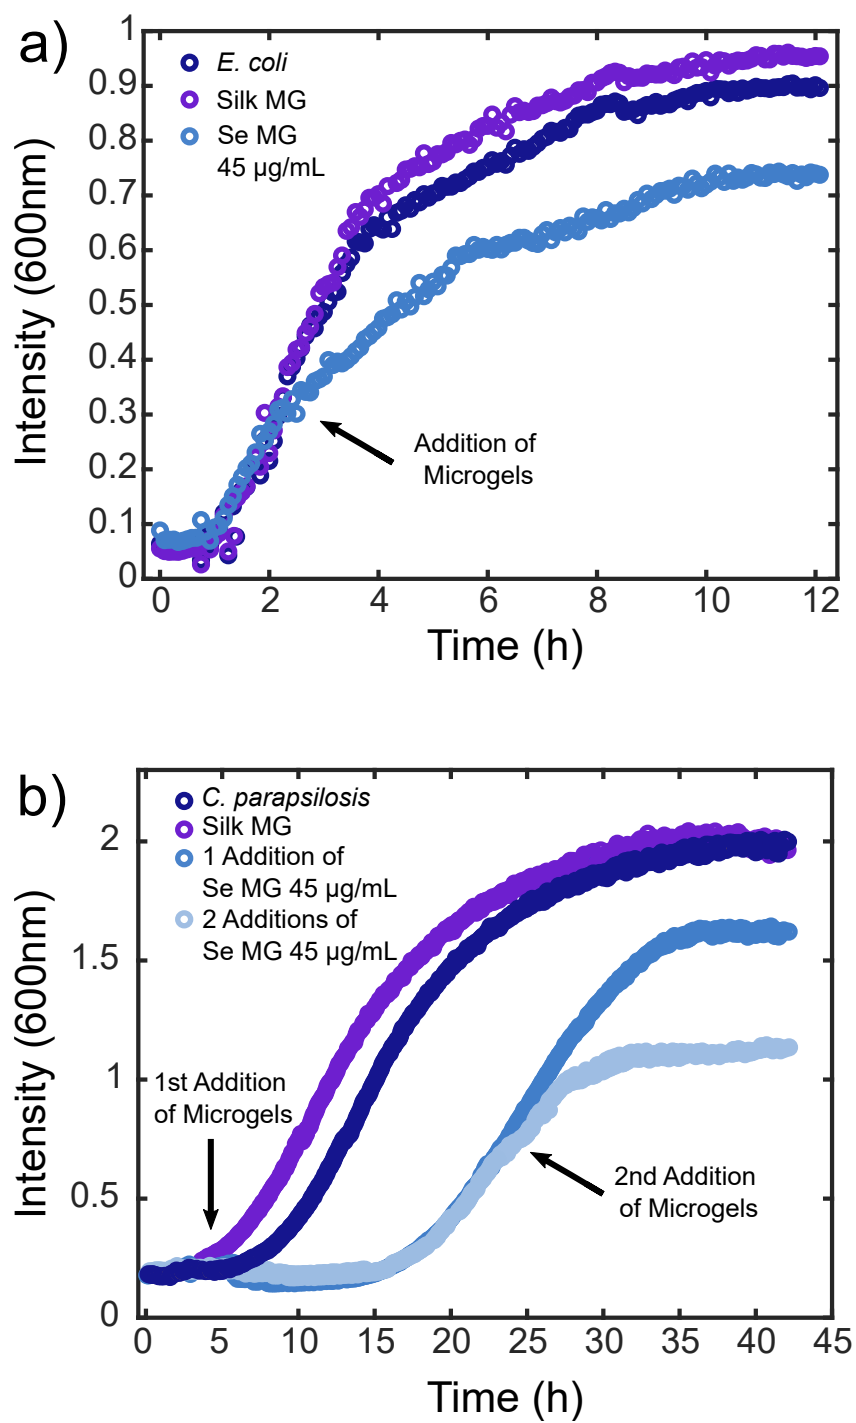

**Figure 6:** Kinetics of bacterial and fungal growth inhibition. Absorbance measurements were conducted at 600 nm for (a) *E. coli* (b) *C. parapsilosis*.

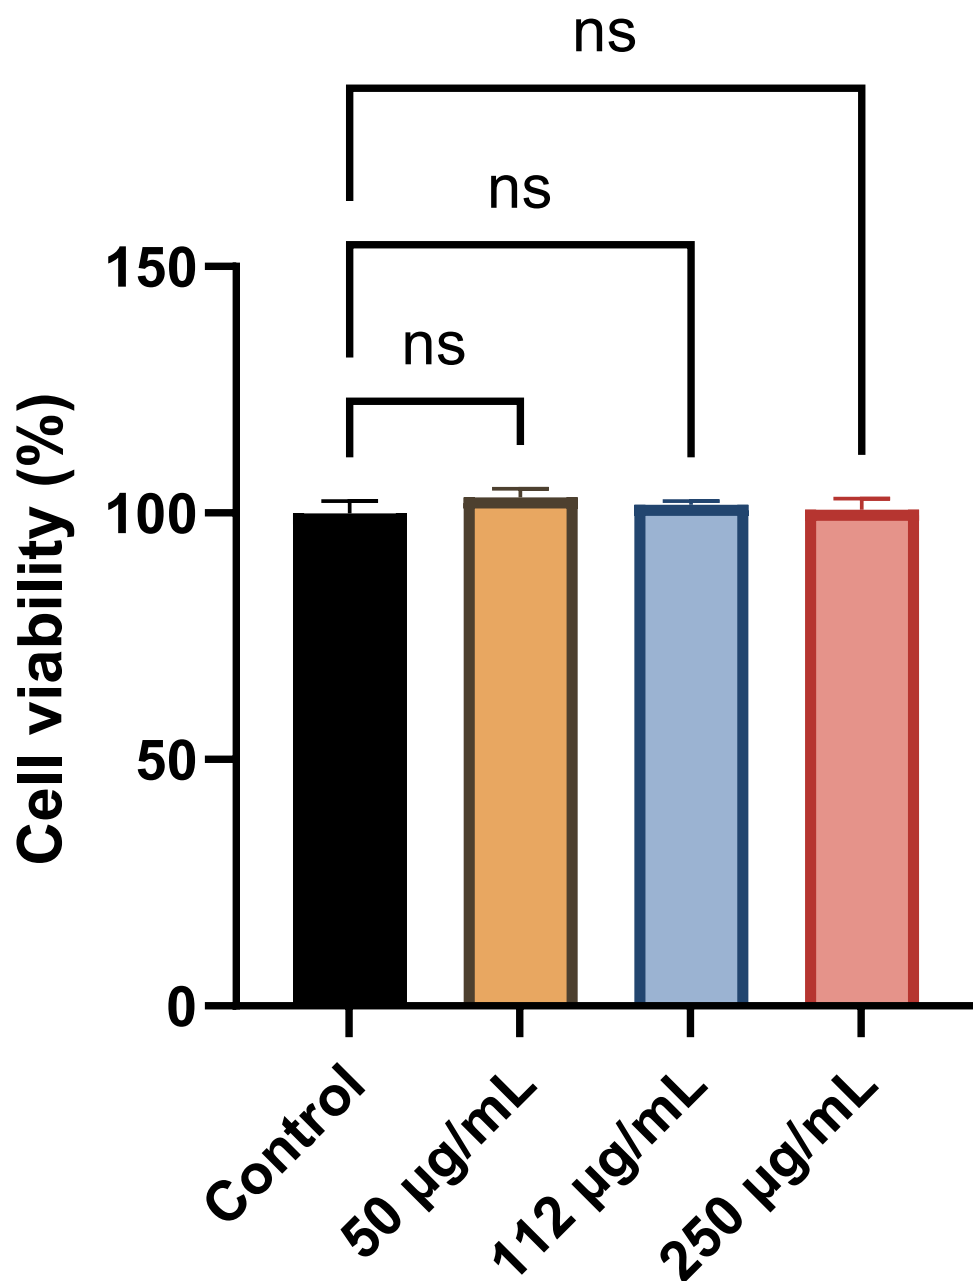

## SeNP concentration within the microgels

**Figure 7:** MTT assay of selenium-silk microgels. The data show the mean  $\pm$  SEM of at least  $n = 3$  individual experiments. A one-way ANOVA test was conducted, and in all cases, no significant difference in viability between the control and the different microgel samples was observed. n.s. = not significant.
